# Supplementary material for: Metabolomic Profiling and Mechanotransduction of Single Chondrocytes Encapsulated in Alginate Microgels
Source: MDPI journal article supplement (doi:10.3390/cells11050900), 2022-03-05
Supplement: s1 [file s1]

# Supporting Information

## Metabolomic Profiling and Mechanotransduction of Single Chondrocytes Encapsulated in Alginate Microgels

*Authors: Jacob P. Fredrikson, Priyanka P. Brahmachary, Ayten E. Erdoğan, Zachary K.*

*Archambault, James N. Wilking, Ronald K. June<sup>\*</sup>, Connie B. Chang<sup>\*</sup>*

Number of Supplemental Pages: 18

Number of Supplemental Figures: 8

Number of Supplemental Tables: 2

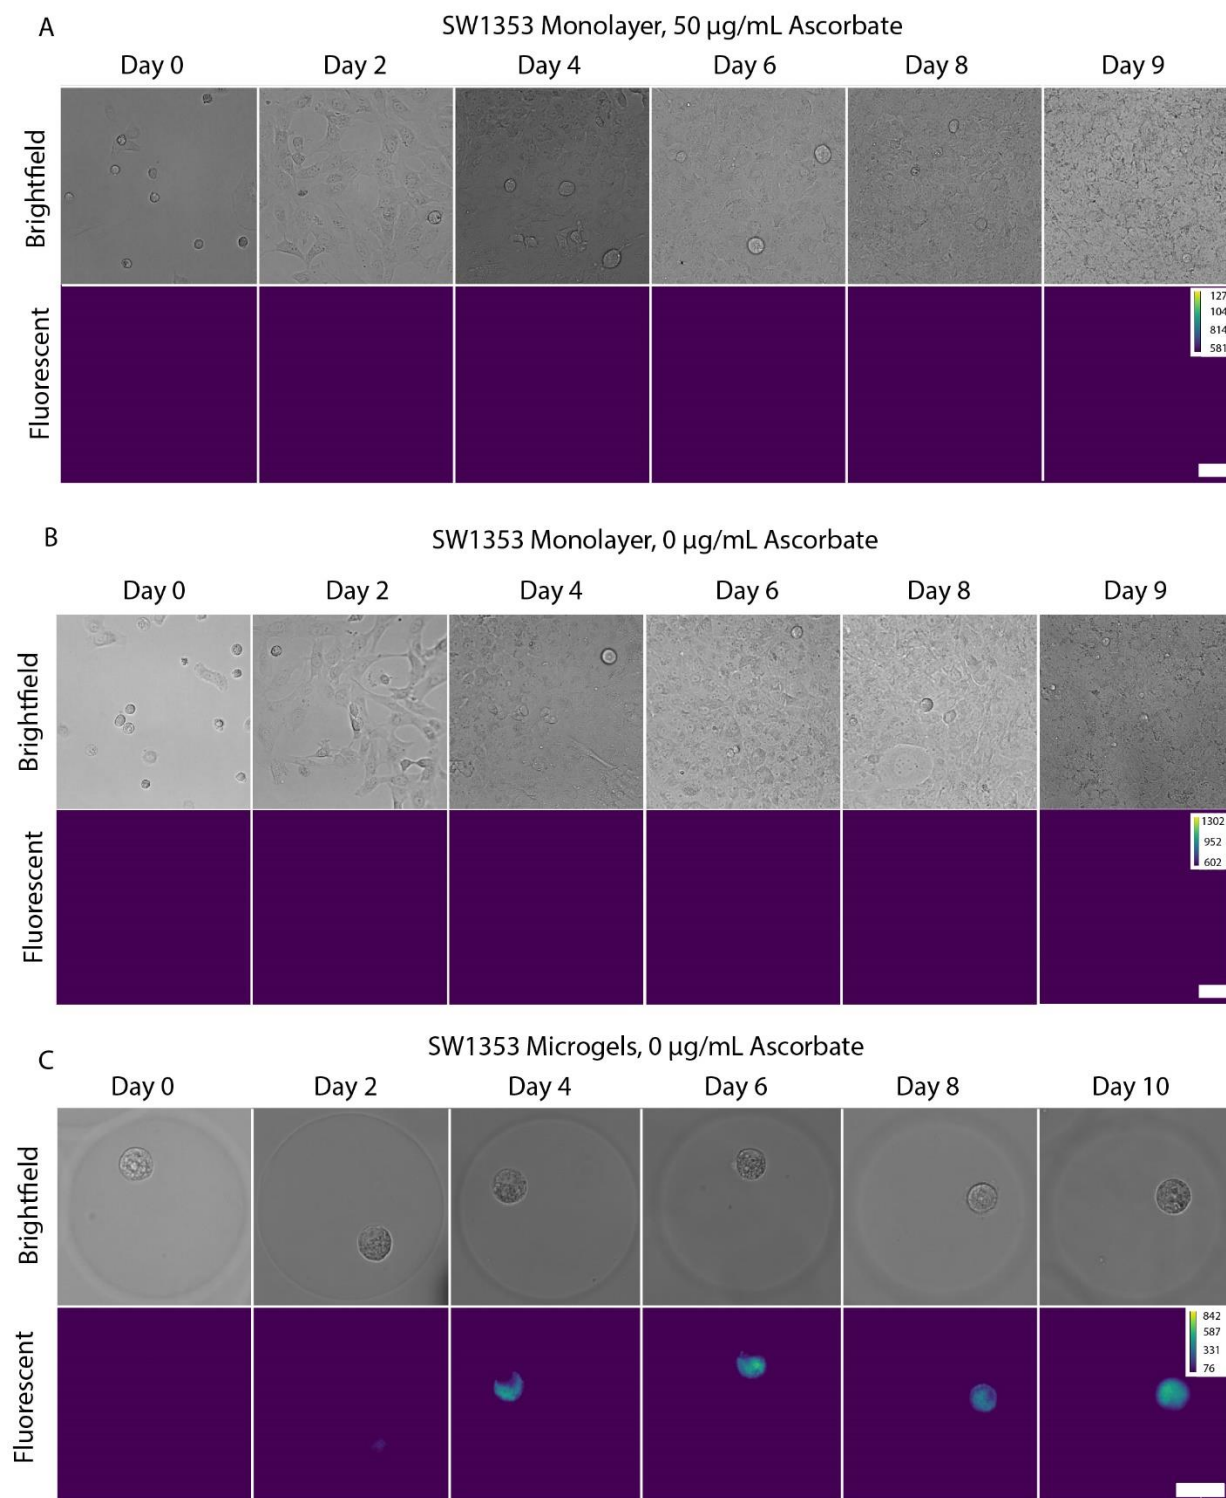

**Figure S1.** Brightfield and fluorescence images of microgels without and with ascorbate of (A) SW1353 cells grown on monolayers with 50  $\mu\text{g mL}^{-1}$  ascorbate. Scale bar = 50  $\mu\text{m}$  (B) SW1353 cells grown on monolayers with 0  $\mu\text{g mL}^{-1}$  ascorbate. Scale bar = 50  $\mu\text{m}$  (C) SW1353 cells encapsulated in alginate microgels and cultured with 0  $\mu\text{g mL}^{-1}$  ascorbate Scale bar =25  $\mu\text{m}$

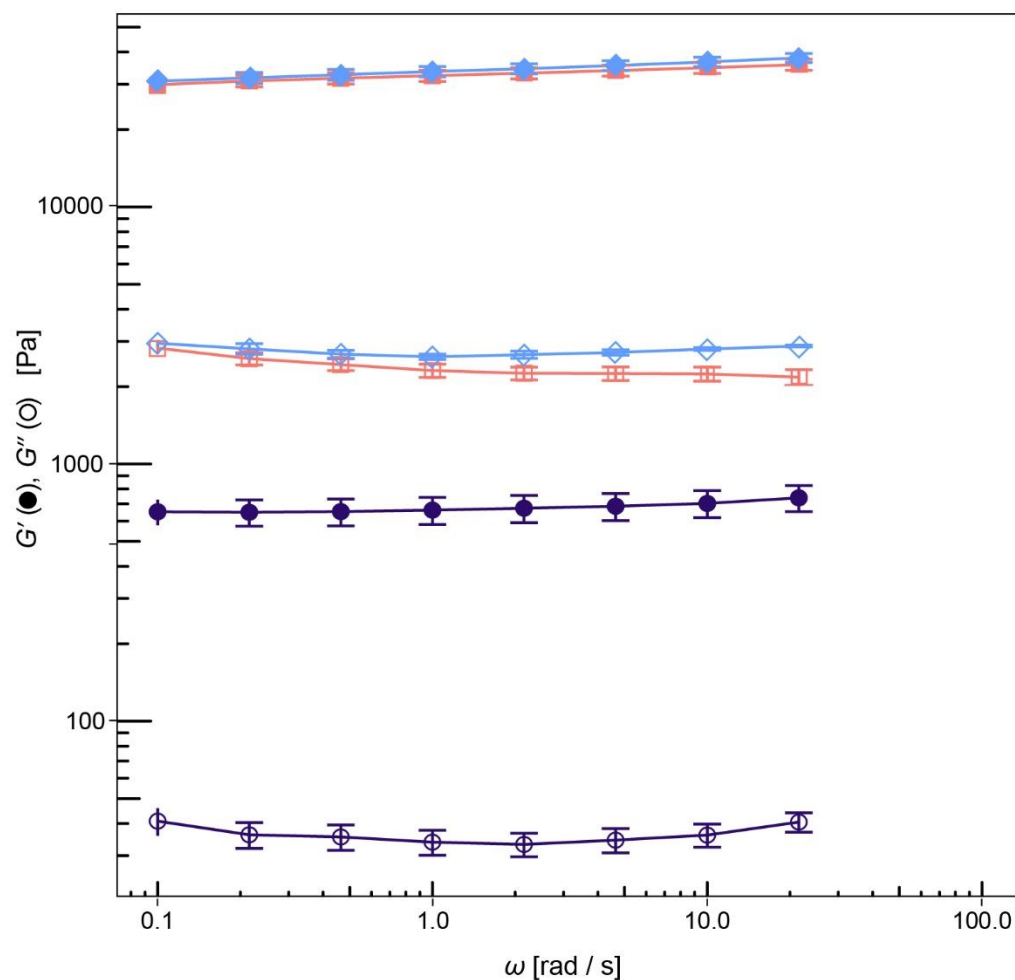

**Figure S2.** Storage ( $G'$ , closed symbols) and loss ( $G''$ , open symbols) moduli versus angular frequency,  $T = 25$  °C, for 4.5% w/w agarose (squares), 1.5% w/w alginate (circles), and 4.5% w/w agarose with 20% v/v 1.5% w/w alginate microgels (diamonds).

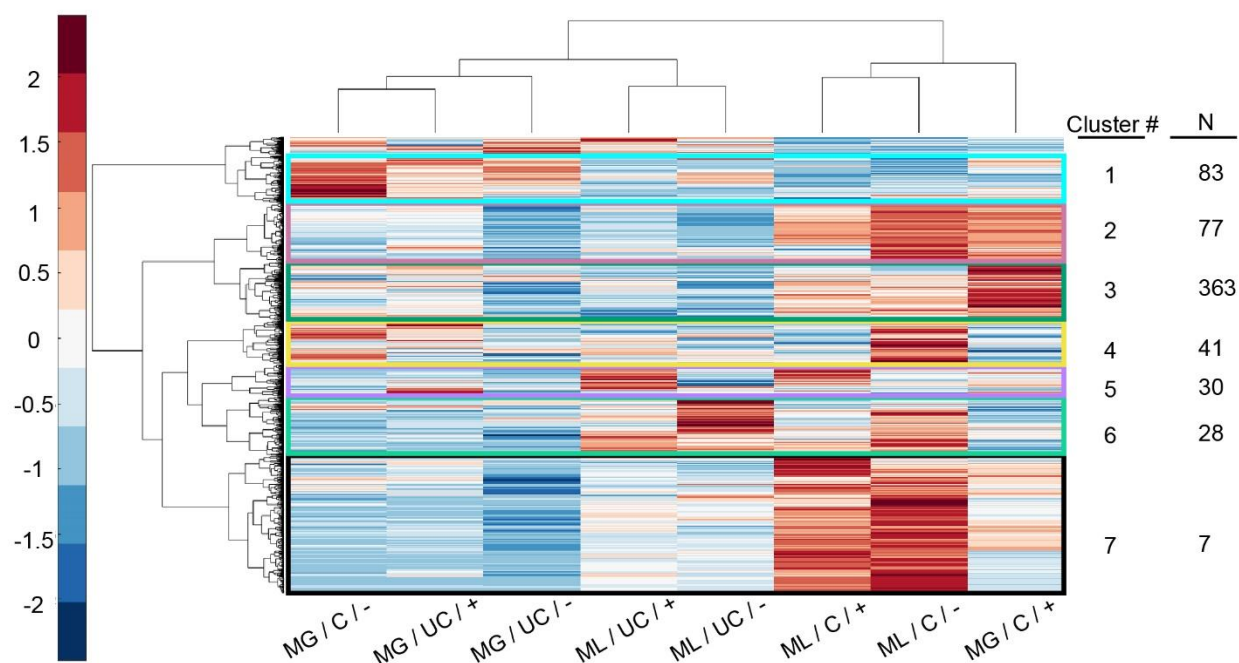

**Figure S3.** Median metabolites across all experimental groups. Metabolite clusters (colored boxes) were subjected to pathway enrichment analysis, but no significant pathways were found after false discovery rate correction. ML (Monolayer), MG (Microgel), C (Compressed), UC (Uncompressed), + (complete media supplemented with 50  $\mu\text{g mL}^{-1}$  L-sodium ascorbate), - (complete media lacking L-sodium ascorbate).

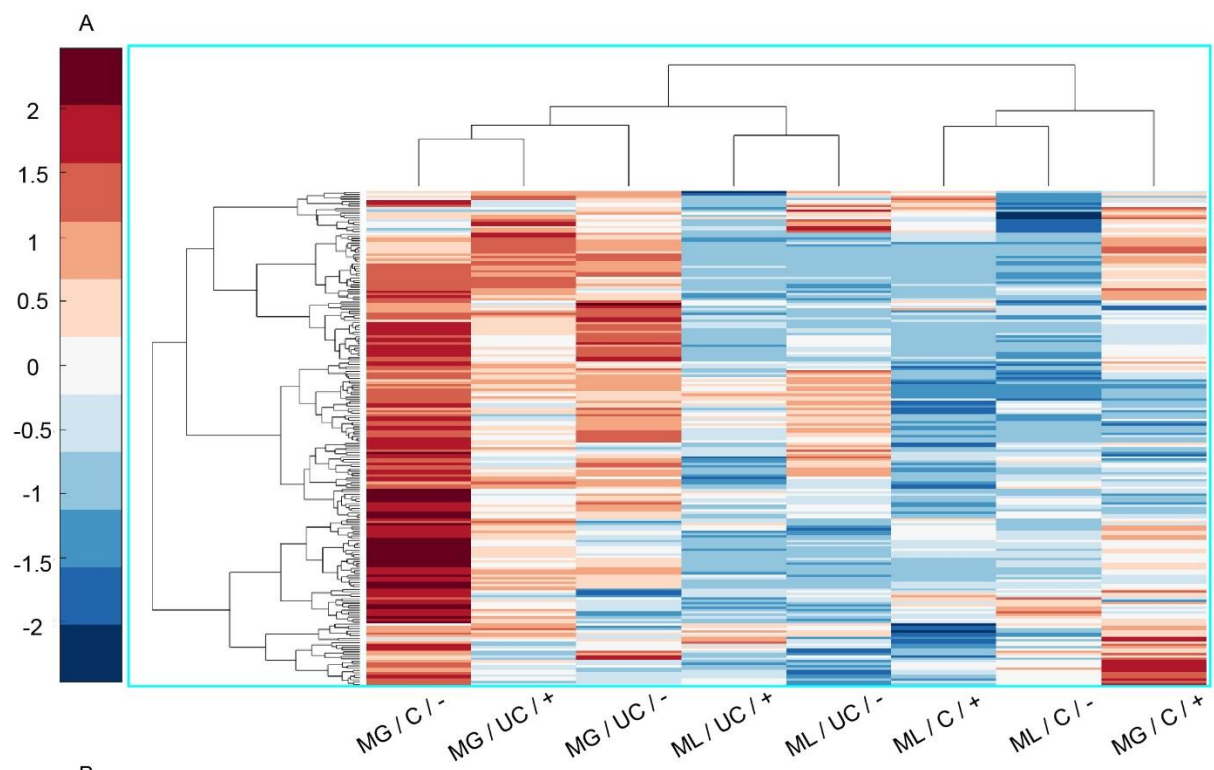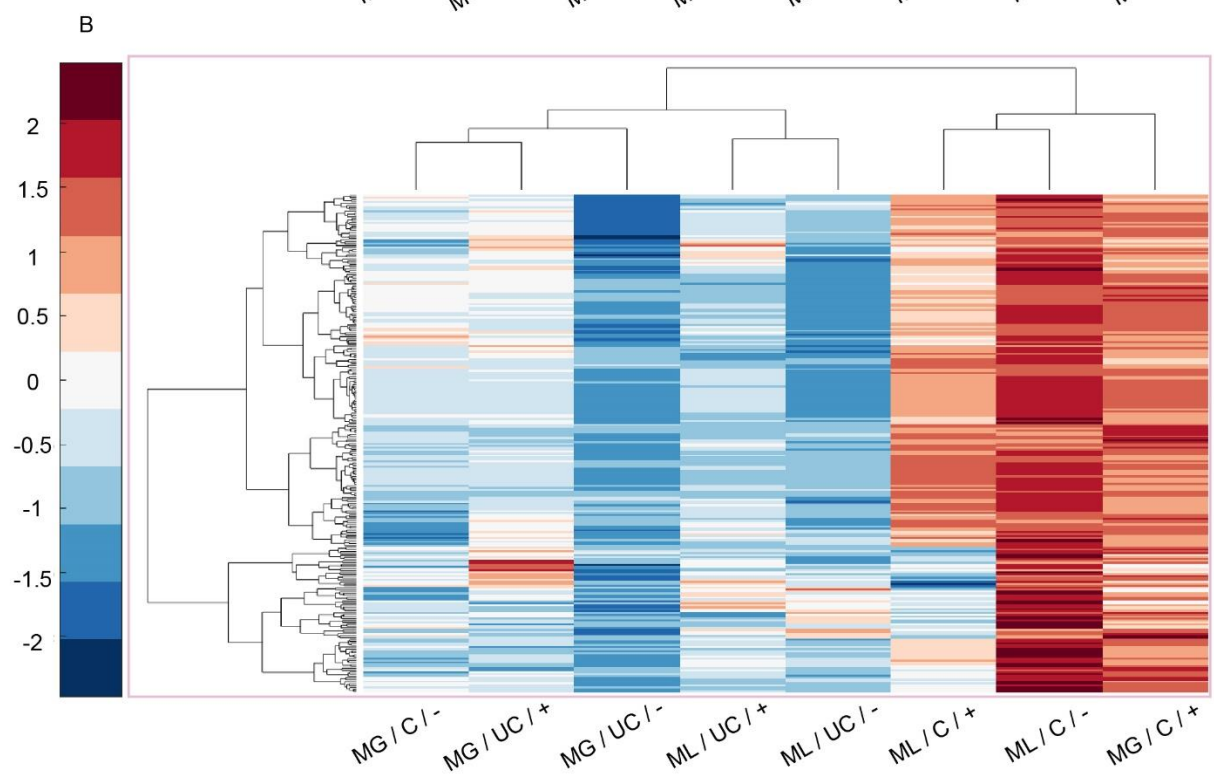

**Figure S4.** Median metabolites across all experimental group. (A) Metabolite cluster 1 and (B) cluster 2 from SI figure 4 were further subjected to pathway enrichment analysis, but no significant pathways were found after false discovery rate correction. ML (Monolayer), MG (Microgel), C (Compressed), UC (Uncompressed), + (complete media supplemented with 50  $\mu\text{g mL}^{-1}$  L-sodium ascorbate), - (complete media lacking L-sodium ascorbate).

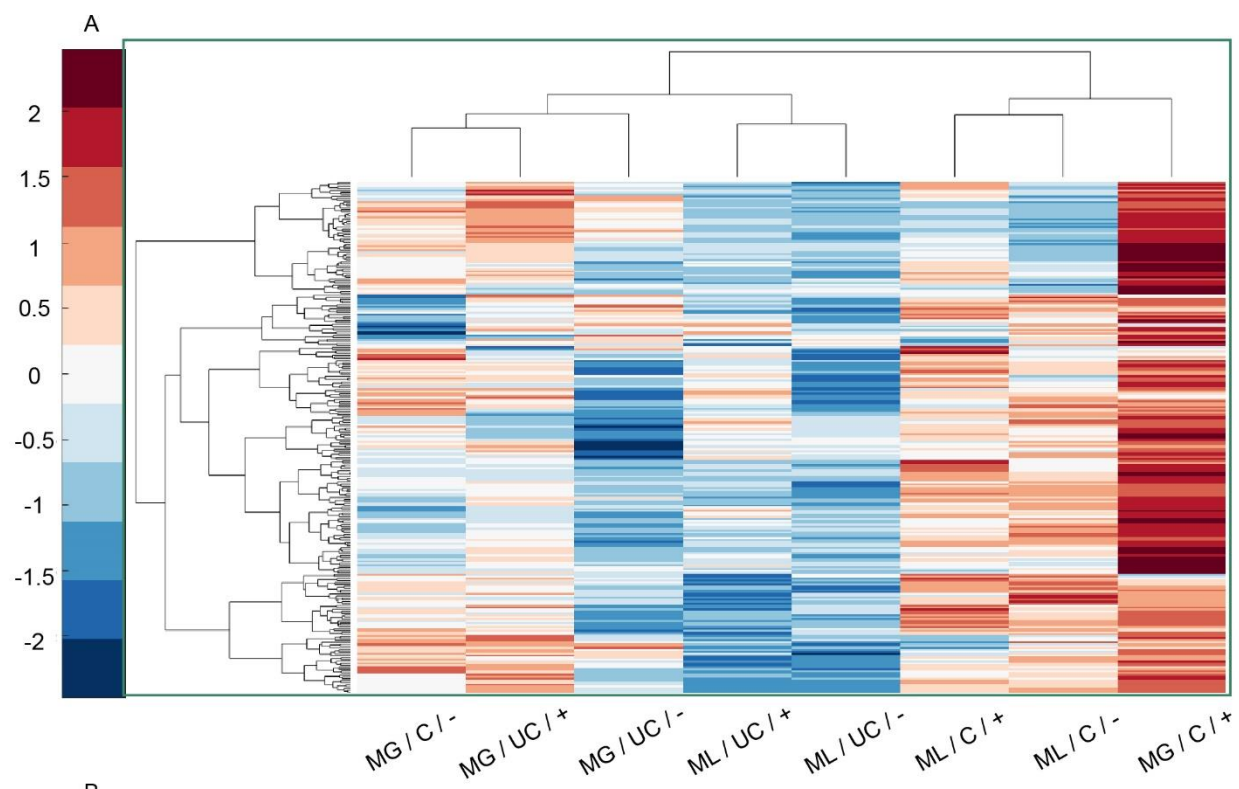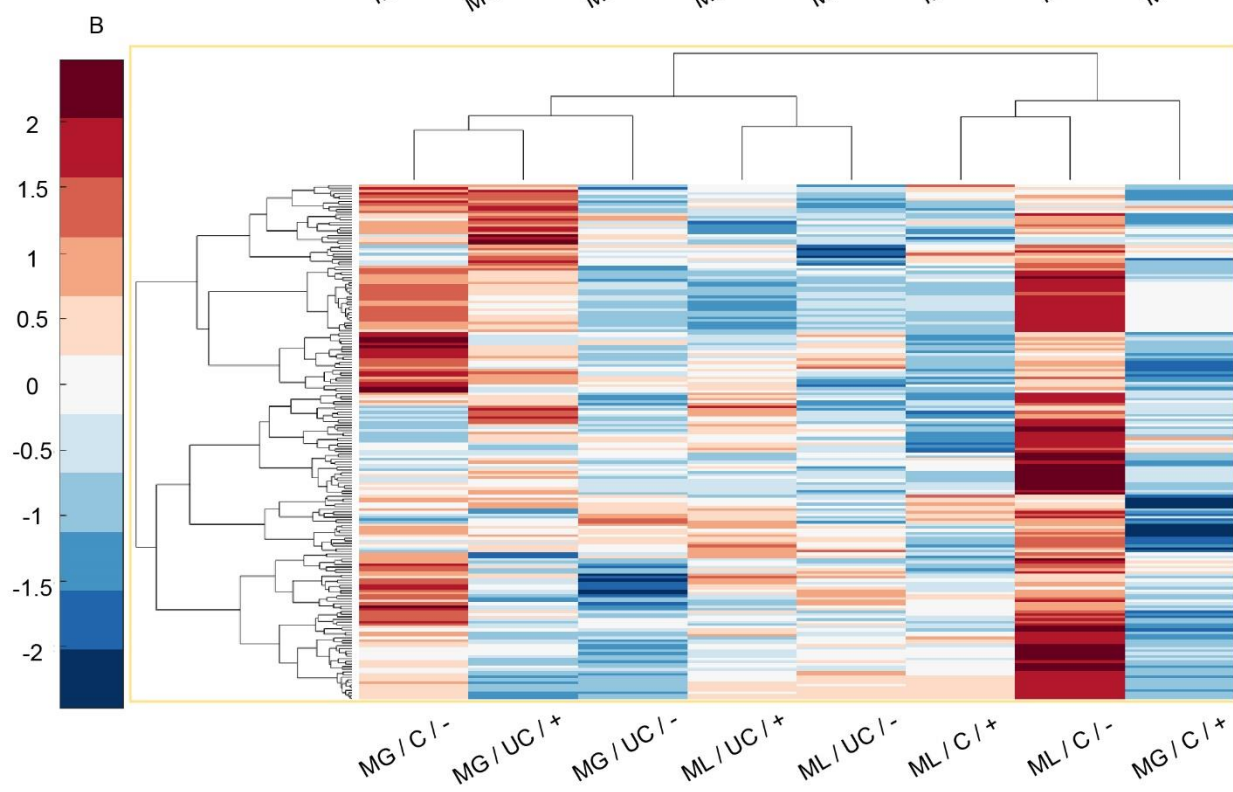

**Figure S5.** Median metabolites across all experimental group. (A) Metabolite cluster 3 and (B) cluster 4 from SI Figure 4 were subjected to pathway enrichment analysis, but no significant pathways were found after false discovery rate correction. ML (Monolayer), MG (Microgel), C (Compressed), UC (Uncompressed), + (complete media supplemented with 50  $\mu\text{g mL}^{-1}$  L-sodium ascorbate), - (complete media lacking L-sodium ascorbate).



A

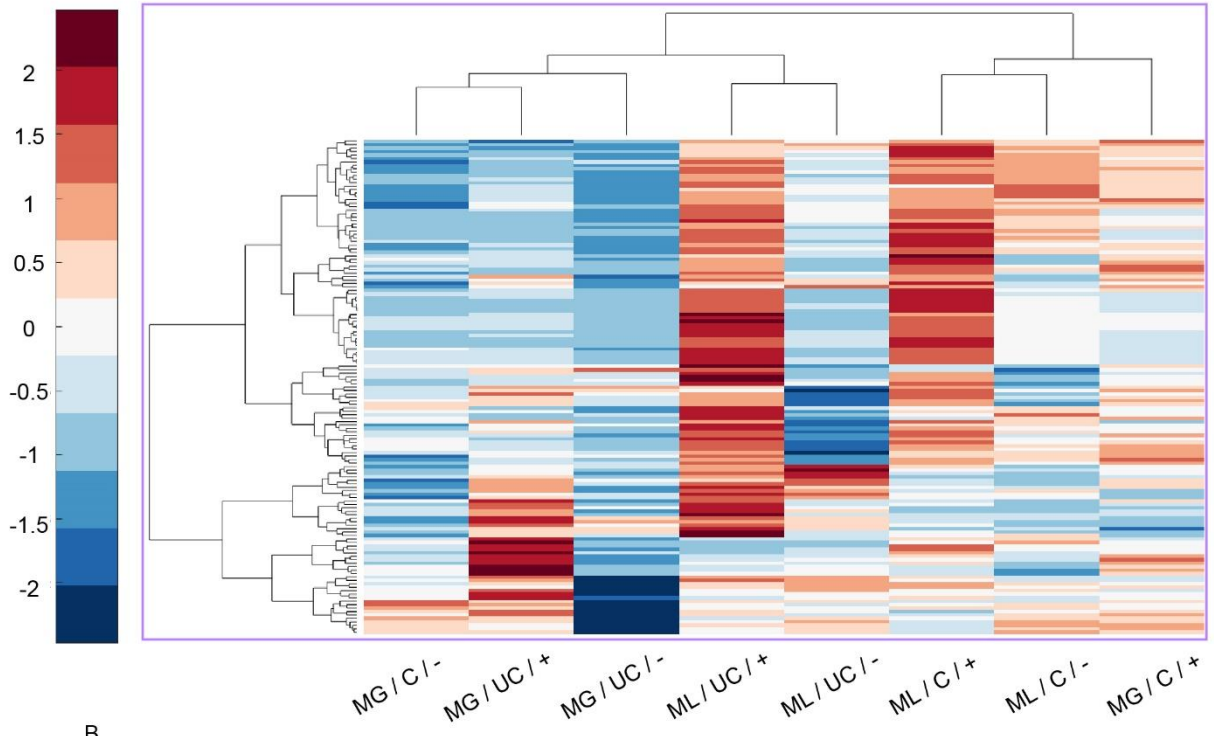

B

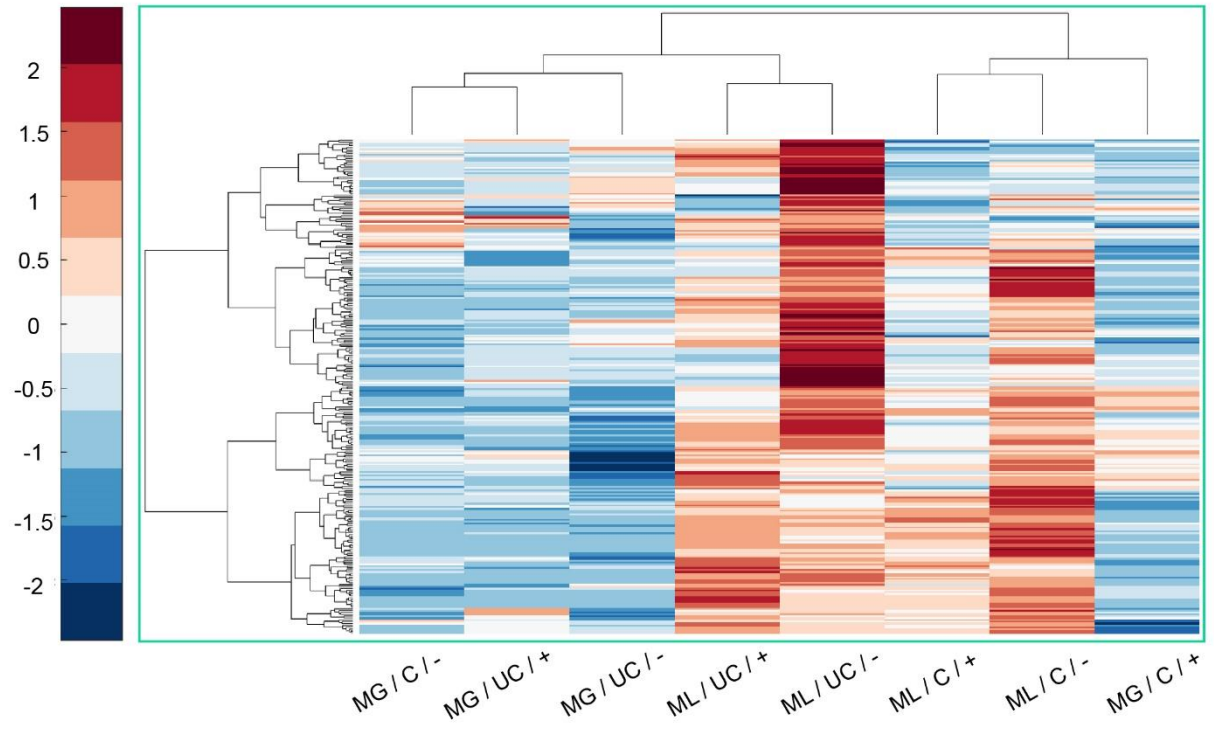

**Figure S6.** Median metabolites across all experimental group. (A) Metabolite cluster 5 and (B) cluster 6 from SI Figure 4 were subjected to pathway enrichment analysis, but no significant pathways were found after false discovery rate correction. ML (Monolayer), MG (Microgel), C (Compressed), UC (Uncompressed), + (complete media supplemented with 50  $\mu\text{g mL}^{-1}$  L-sodium ascorbate), - (complete media lacking L-sodium ascorbate).

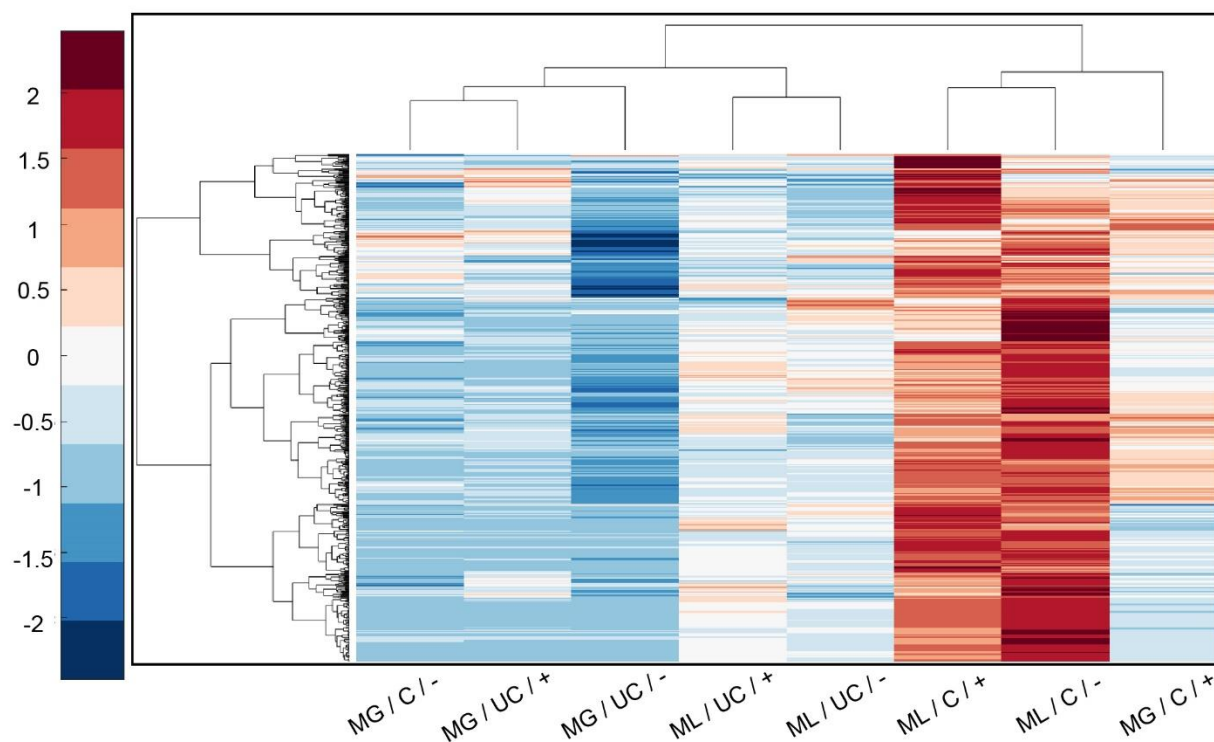

**Figure S7.** Median metabolites across all experimental group. Metabolite cluster 7 from SI Figure 4 was subjected to pathway enrichment analysis, but no significant pathways were found after false discovery rate correction. ML (Monolayer), MG (Microgel), C (Compressed), UC (Uncompressed), + (complete media supplemented with 50  $\mu\text{g mL}^{-1}$  L-sodium ascorbate), - (complete media lacking L-sodium ascorbate).

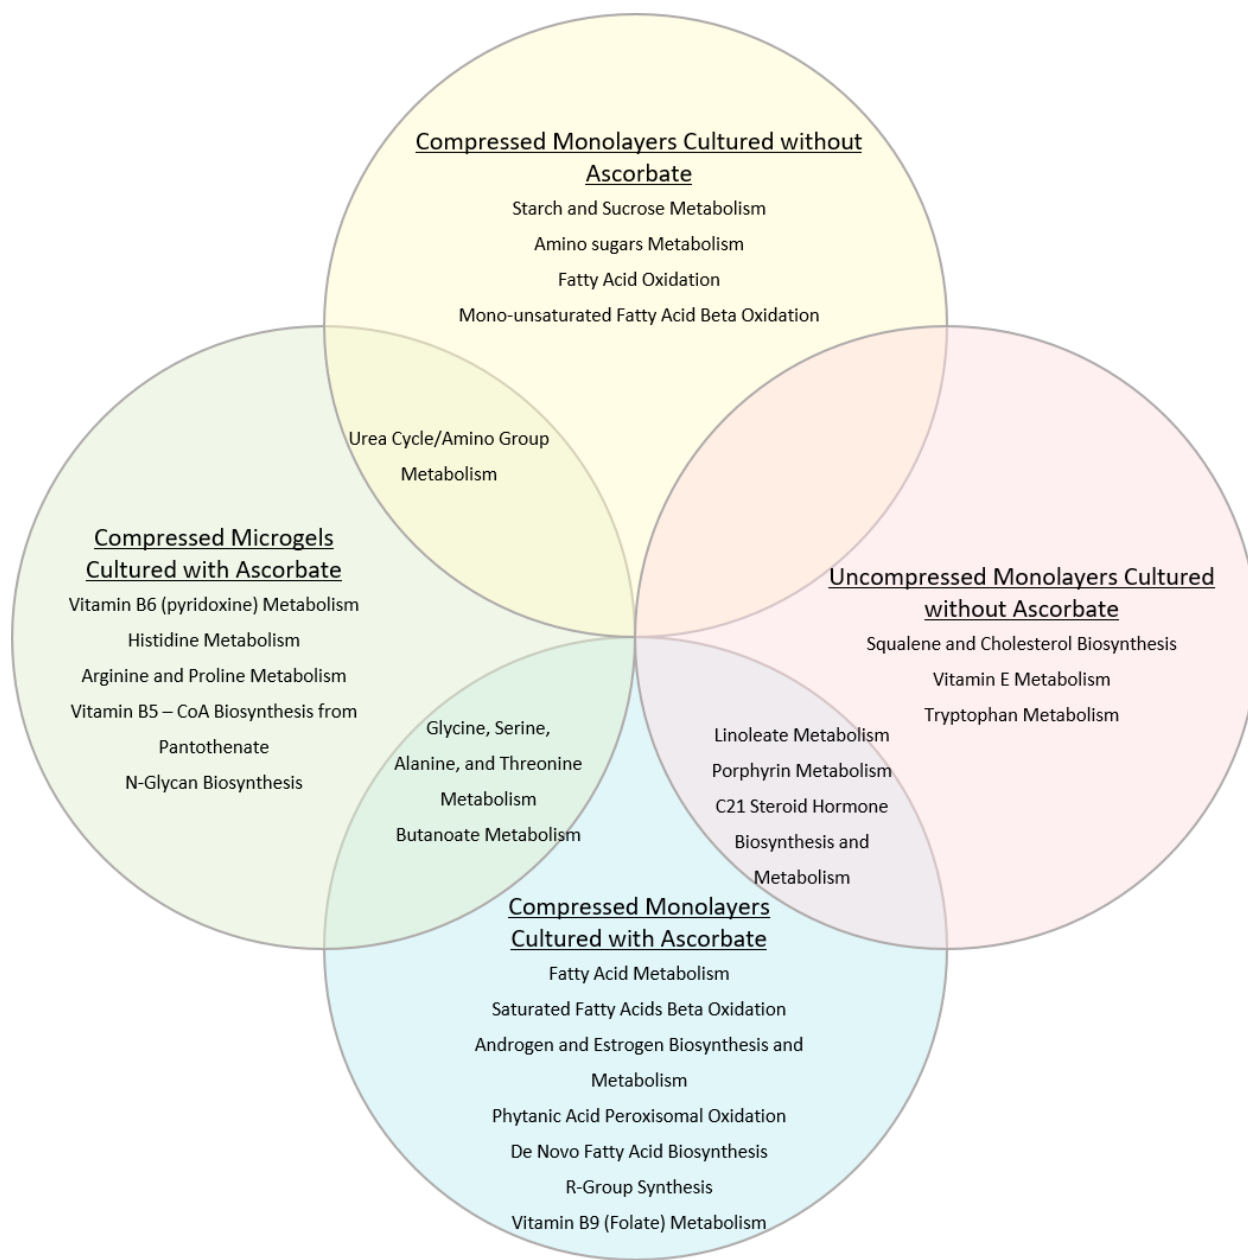

**Figure S8.** Venn diagram of significant pathways for each group.

| Hydrogel                                | $\omega$<br>[rad/s] | $G'$ [Pa]             | $G''$ [Pa]            |
|-----------------------------------------|---------------------|-----------------------|-----------------------|
| 4.5% w/w Agarose                        | 0.100               | 3.0E+04 $\pm$ 2.9E+03 | 2.8E+03 $\pm$ 2.4E+02 |
|                                         | 0.215               | 3.1E+04 $\pm$ 2.7E+03 | 2.6E+03 $\pm$ 2.4E+02 |
|                                         | 0.464               | 3.2E+04 $\pm$ 2.8E+03 | 2.4E+03 $\pm$ 2.2E+02 |
|                                         | 1.000               | 3.2E+04 $\pm$ 2.8E+03 | 2.3E+03 $\pm$ 2.3E+02 |
|                                         | 2.154               | 3.3E+04 $\pm$ 2.8E+03 | 2.3E+03 $\pm$ 2.2E+02 |
|                                         | 4.642               | 3.4E+04 $\pm$ 2.9E+03 | 2.2E+03 $\pm$ 2.4E+02 |
|                                         | 10.000              | 3.5E+04 $\pm$ 3.0E+03 | 2.2E+03 $\pm$ 2.4E+02 |
|                                         | 21.544              | 3.6E+04 $\pm$ 3.0E+03 | 2.2E+03 $\pm$ 2.6E+02 |
| 1.5 % w/w Alginate                      | 0.100               | 6.5E+02 $\pm$ 1.8E+02 | 4.1E+01 $\pm$ 1.2E+01 |
|                                         | 0.215               | 6.5E+02 $\pm$ 1.9E+02 | 3.6E+01 $\pm$ 1.0E+01 |
|                                         | 0.464               | 6.5E+02 $\pm$ 1.9E+02 | 3.5E+01 $\pm$ 9.8E+00 |
|                                         | 1.000               | 6.6E+02 $\pm$ 2.0E+02 | 3.4E+01 $\pm$ 9.3E+00 |
|                                         | 2.154               | 6.7E+02 $\pm$ 2.0E+02 | 3.3E+01 $\pm$ 8.5E+00 |
|                                         | 4.642               | 6.9E+02 $\pm$ 2.0E+02 | 3.4E+01 $\pm$ 9.2E+00 |
|                                         | 10.000              | 7.0E+02 $\pm$ 2.1E+02 | 3.6E+01 $\pm$ 9.1E+00 |
|                                         | 21.544              | 7.4E+02 $\pm$ 2.1E+02 | 4.1E+01 $\pm$ 8.6E+00 |
| Agarose + 20% v/v<br>Alginate Microgels | 0.100               | 3.1E+04 $\pm$ 2.7E+03 | 2.9E+03 $\pm$ 1.6E+02 |
|                                         | 0.215               | 3.2E+04 $\pm$ 2.8E+03 | 2.8E+03 $\pm$ 2.3E+02 |
|                                         | 0.464               | 3.3E+04 $\pm$ 2.7E+03 | 2.7E+03 $\pm$ 1.6E+02 |
|                                         | 1.000               | 3.4E+04 $\pm$ 2.7E+03 | 2.6E+03 $\pm$ 1.0E+02 |
|                                         | 2.154               | 3.4E+04 $\pm$ 2.7E+03 | 2.7E+03 $\pm$ 1.5E+02 |
|                                         | 4.642               | 3.5E+04 $\pm$ 2.7E+03 | 2.7E+03 $\pm$ 1.1E+02 |
|                                         | 10.000              | 3.7E+04 $\pm$ 2.7E+03 | 2.8E+03 $\pm$ 5.9E+01 |
|                                         | 21.544              | 3.8E+04 $\pm$ 2.7E+03 | 2.9E+03 $\pm$ 4.2E+01 |

**Table S1.** Elastic ( $G'$ ) and Storage ( $G''$ ) moduli of 4.5% w/w agarose, 1.5% w/w alginate, and 4.5% w/w agarose with 20% v/v 1.5% w/w alginate microgels for varying angular frequencies. Rheology was performed on a TA Instruments AR-G2 rheometer with a parallel plate geometry.

Cluster #2 – Compressed Monolayers Cultured without Ascorbate (Up-regulated)

|                                      | Gamma    | Matched Metabolites                                                                                                                                               |
|--------------------------------------|----------|-------------------------------------------------------------------------------------------------------------------------------------------------------------------|
| Starch and<br>Sucrose<br>Metabolism  | 0.0441   | *Maltopentaose<br>*D-Glucose<br>*D-Glucose<br>*Alpha-D-Glucose                                                                                                    |
| Urea cycle/amino<br>group metabolism | 0.048281 | *Creatinine<br>*L-Arginine<br>*2-(3-Carboxy-3-(methyllummonio)propyl)-L-<br>histidine<br>*L-Methionine – the 1 <sup>st</sup> amino group (essential)<br>*Creatine |
| Aminosugars<br>metabolism            | 0.048739 | *Chitin<br>*(N-acetylneuraminosyl(a2-6)lactosamine)<br>*Phosphoenolpyruvic acid                                                                                   |

Cluster #3 – Compressed Microgels Cultured with Ascorbate (Up-regulated)

|                                          | Gamma    | Matched Metabolites                                                                                                              |
|------------------------------------------|----------|----------------------------------------------------------------------------------------------------------------------------------|
| Vitamin B6<br>(pyridoxine)<br>metabolism | 0.035844 | *Pyridoxamine<br>*Pyridoxine                                                                                                     |
| Urea cycle/amino<br>group metabolism     | 0.036024 | *L-Proline<br>*Hippuric acid<br>*Citrulline<br>*4-Acetamidobutanoic acid<br>*4-Aminobutyraldehyde<br>*N-Methylphenylethanolamine |

|                                                   |          |                                                                                                                                                                      |
|---------------------------------------------------|----------|----------------------------------------------------------------------------------------------------------------------------------------------------------------------|
|                                                   |          | *Norepinephrine                                                                                                                                                      |
| Histidine metabolism                              | 0.036669 | *5-Formiminotetrahydrofolic acid<br>*Methylimidazoleacetic acid<br>*Carnosine                                                                                        |
| Glycine, serine, alanine and threonine metabolism | 0.040908 | *Betaine<br>*2-methylbutyrylglycine<br>*Isovalerylglycine<br>*L-Allothreonine<br>*L-Threonine                                                                        |
| Arginine and Proline Metabolism                   | 0.040908 | *L-Proline<br>*Citrulline<br>*4-Acetamidobutanoic acid<br>*1-Pyrroline-2-carboxylic acid<br>*4-Aminobutyraldehyde<br>*D-Proline<br>*Pyrroline hydroxycarboxylic acid |
| Vitamin B5 - CoA biosynthesis from pantothenate   | 0.045044 | *4-Phosphopantothenoylcysteine<br>*Pantetheine                                                                                                                       |
| Butanoate metabolism                              | 0.045044 | *2-Keto-6-acetamidocaproate<br>*5-Aminopentanoic acid                                                                                                                |
| Glutathione Metabolism                            | 0.045044 | *Pyroglutamic acid<br>*gamma-Glutamylcysteine                                                                                                                        |
| N-Glycan biosynthesis                             | 0.04861  | *Uridine diphosphategalactose<br>*Uridine diphosphate glucose<br>*N,N'-Diacetylchitobiosyldiphosphodolichol<br>*Dolichol-20                                          |

Cluster #4 - Compressed Monolayers Cultured without Ascorbate (Up-regulated)

|  |       |                     |
|--|-------|---------------------|
|  | Gamma | Matched Metabolites |
|--|-------|---------------------|

|                                            |          |                                                                                                                                                                                    |
|--------------------------------------------|----------|------------------------------------------------------------------------------------------------------------------------------------------------------------------------------------|
| Fatty acid oxidation                       | 0.041484 | *2,6 dimethylheptanoyl-CoA<br>*Gamma-linolenoyl-CoA<br>*4,8 dimethylnonanoyl-CoA<br>*Trans-Octadec-2-enoyl-CoA<br>* Hexadecenoyl-CoA<br>* Vaccenyl coenzyme A<br>*Octadecenoyl-CoA |
| Mono-unsaturated fatty acid beta-oxidation | 0.047503 | * 3-oxolaur-cis-5-enoyl-CoA<br>*Palmitoleoyl-CoA                                                                                                                                   |

Cluster #6 - Uncompressed Monolayers Cultured without Ascorbate (Up-regulated)

|                                                 | Gamma    | Matched Metabolites                                                                                                                                            |
|-------------------------------------------------|----------|----------------------------------------------------------------------------------------------------------------------------------------------------------------|
| Linoleate metabolism                            | 0.033754 | *LysoPC(18:1(9Z))<br>*(11S)-11-Hydroperoxylinoleic acid<br>* 9,10-12,13-diepoxy-octadecanoate                                                                  |
| Squalene and cholesterol biosynthesis           | 0.041083 | * 4,4-dimethylcholesta-8(9),14-dien-3beta-ol<br>*Presqualene diphosphate<br>*4,4-Dimethyl-5a-cholesta-8,24-dien-3-b-ol<br>*Avenasterol<br>* Delta7-Avenasterol |
| Porphyrin metabolism                            | 0.04495  | *Protoporphyrinogen IX<br>*Uroporphyrin I<br>*Uroporphyrin III                                                                                                 |
| C21-steroid hormone biosynthesis and metabolism | 0.04495  | *Cholesterol sulfate<br>*Estrone sulfate                                                                                                                       |

|                       |          |                                                                                                 |
|-----------------------|----------|-------------------------------------------------------------------------------------------------|
| Vitamin E metabolism  | 0.048938 | *Phenylacetaldehyde<br>*9'-carboxy-alpha-chromanol                                              |
| Tryptophan metabolism | 0.052097 | *Cyclic 3-hydroxymelatonin<br>*6-Hydroxymelatonin<br>*Melatonin radical<br>*Tetrahydrobiopterin |

Cluster #7 – Compressed Monolayers Cultured with and without Ascorbate (Up-regulated)

|                                                   | Gamma    | Matched Metabolites                                                                                                                                       |
|---------------------------------------------------|----------|-----------------------------------------------------------------------------------------------------------------------------------------------------------|
| Fatty Acid Metabolism                             | 0.011922 | *Tetradecanoyl-CoA<br>*Palmityl-CoA<br>*(2E)-Dodecenoyl-CoA<br>*3-Oxotetradecanoyl-CoA<br>*3-dodecenoyl CoA                                               |
| Saturated fatty acids beta-oxidation              | 0.011922 | *Tetradecanoyl-CoA<br>*Palmityl-CoA<br>*(S)-3-Hydroxytetradecanoyl-CoA<br>*3-Oxotetradecanoyl-CoA<br>*(S)-3-Hydroxydodecanoyl-CoA<br>*(2E)-Dodecenoyl-CoA |
| Androgen and estrogen biosynthesis and metabolism | 0.017094 | *Estrone sulfate<br>*Trypanothione disulfide<br>*17-beta-Estradiol-3-glucuronide<br>*Androstenedione<br>*Estrone glucuronide                              |
| Porphyrin metabolism                              | 0.018407 | *Heme O<br>*Coproporphyrin I<br>*Protoporphyrinogen IX<br>*Coproporphyrin III                                                                             |



|                                                   |          |                                                                                                                                                                                                                                                  |
|---------------------------------------------------|----------|--------------------------------------------------------------------------------------------------------------------------------------------------------------------------------------------------------------------------------------------------|
| C21-steroid hormone biosynthesis and metabolism   | 0.018407 | *Androst-4-ene-3,17-dione<br>*Estrone-glucuronide<br>*Estrone sulfate<br>*Androstenedione<br>*17beta-estradiol 3-glucosiduronic acid                                                                                                             |
| Phytanic acid peroxisomal oxidation               | 0.021904 | *Pristanoyl-CoA<br>*4,8,12-Trimethyltridecanoyl-CoA<br>*3(S)-2-hydroxyphytanoyl-CoA<br>*(2R)-pristanoyl-CoA;<br>*(2S)-pristanoyl-CoA<br>*3(R)-hydroxy-pristanoyl-CoA                                                                             |
| De novo fatty acid biosynthesis                   | 0.023437 | *Palmitoyl-CoA<br>*Linoleoyl-CoA<br>*Tetradecanoyl-CoA;<br>*Arachidonyl-CoA<br>*3-hydroxyoctadecanoyl-CoA<br>*3-hydroxytetracosanoyl-CoA<br>*3-hydroxyeicosanoyl-CoA<br>*3(S)-hydroxy-11-cis-eicosenoyl-CoA<br>*Trans,cis-2,11-eicosadienoyl-CoA |
| Glycine, serine, alanine and threonine metabolism | 0.031029 | *Arachidonyl-CoA<br>*Creatine<br>*L-Allothreonine<br>*L-Threonine                                                                                                                                                                                |
| R Group Synthesis                                 | 0.033308 | *Palmitoyl-CoA<br>*Tetradecanoyl-CoA                                                                                                                                                                                                             |
| Butanoate metabolism                              | 0.033308 | *2-Keto-6-acetamidocaproate<br>*5-Acetamidovalerate                                                                                                                                                                                              |
| Glutathione Metabolism                            | 0.033308 | *Pyroglutamic acid<br>*Trypanothione disulfide                                                                                                                                                                                                   |

|                                      |          |                                                                  |
|--------------------------------------|----------|------------------------------------------------------------------|
| Vitamin B9<br>(folate)<br>metabolism | 0.044339 | *10-formyltetrahydrofolate-[Glu](5)<br>*Tetrahydrofolyl-[Glu](n) |
|--------------------------------------|----------|------------------------------------------------------------------|

**Table S2.** All significant pathways found and the corresponding gamma values and matched metabolites.
